# Supplementary material for: Association of Monoamine Oxidase A (MAOA) Gene uVNTR and rs6323 Polymorphisms with Attention Deficit and Hyperactivity Disorder in Korean Children
Source: PubMed Central journal article supplement (PMC6122096; doi:10.3390/medicina54030032), 2018-05-18
Supplement: medicina-54-00032-s001.pdf [file medicina-54-00032-s001.pdf]

Supplementary Table S1. Pairwise Linkage Disequilibrium (LD) Matrices in the ADHD children and controls.

| Group (Boys)  | VNTR | G941T | Frequency | D     | D'    |
|---------------|------|-------|-----------|-------|-------|
| Case          |      |       |           |       |       |
|               | 3.5  | G     | 0.608     |       |       |
|               | 3.5  | T     | 0.309     | 0.187 | 0.858 |
|               | 4.5  | G     | 0.052     |       |       |
|               | 4.5  | T     | 0.031     |       |       |
| Control       |      |       |           |       |       |
|               | 3.5  | G     | 0.489     |       |       |
|               | 3.5  | T     | 0.378     | 0.181 | 0.810 |
|               | 4.5  | G     | 0.090     |       |       |
|               | 4.5  | T     | 0.043     |       |       |
| Group (Girls) | VNTR | G941T | Frequency | D     | D'    |
| Case          |      |       |           |       |       |
|               | 3.5  | G     | 0.531     |       |       |
|               | 3.5  | T     | 0.077     | 0.155 | 0.668 |
|               | 4.5  | G     | 0.087     |       |       |
|               | 4.5  | T     | 0.305     |       |       |
| Control       |      |       |           |       |       |
|               | 3.5  | G     | 0.537     |       |       |
|               | 3.5  | T     | 0.058     | 0.188 | 0.789 |
|               | 4.5  | G     | 0.050     |       |       |
|               | 4.5  | T     | 0.355     |       |       |
